# Supplementary material
Source: MDPI journal article supplement (https://www.mdpi.com/2304-6740/6/4/122)

# checkCIF/PLATON report

You have not supplied any structure factors. As a result the full set of tests cannot be run.

THIS REPORT IS FOR GUIDANCE ONLY. IF USED AS PART OF A REVIEW PROCEDURE FOR PUBLICATION, IT SHOULD NOT REPLACE THE EXPERTISE OF AN EXPERIENCED CRYSTALLOGRAPHIC REFEREE.

No syntax errors found.      CIF dictionary      Interpreting this report

## Datablock: str0604

---

Bond precision:    C-C = 0.0049 A

Wavelength=0.71073

Cell:                a=14.310(3)                b=16.653(4)                c=18.478(4)  
                      alpha=115.075(3)        beta=94.809(4)        gamma=99.124(3)  
Temperature:        150 K

|                | Calculated                        | Reported                 |
|----------------|-----------------------------------|--------------------------|
| Volume         | 3881.4(15)                        | 3881.2(14)               |
| Space group    | P -1                              | P-1                      |
| Hall group     | -P 1                              | ?                        |
| Moiety formula | C40 H30 Fe2 O4 P2 S2, C H2<br>Cl2 | ?                        |
| Sum formula    | C41 H32 Cl2 Fe2 O4 P2 S2          | C41 H32 Cl2 Fe2 O4 P2 S2 |
| Mr             | 897.33                            | 897.33                   |
| Dx,g cm-3      | 1.536                             | 1.536                    |
| Z              | 4                                 | 4                        |
| Mu (mm-1)      | 1.117                             | 1.117                    |
| F000           | 1832.0                            | 1832.0                   |
| F000'          | 1838.28                           |                          |
| h,k,lmax       | 19,22,24                          | 18,21,23                 |
| Nref           | 19375                             | 17593                    |
| Tmin,Tmax      | 0.739,0.915                       | 0.745,0.916              |
| Tmin'          | 0.724                             |                          |

Correction method= # Reported T Limits: Tmin=0.745 Tmax=0.916

AbsCorr = MULTI-SCAN

Data completeness= 0.908

Theta(max)= 28.340

R(reflections)= 0.0512( 12821)

wR2(reflections)= 0.1484( 17593)

S = 1.022

Npar= 955

---

The following ALERTS were generated. Each ALERT has the format

**test-name\_ALERT\_alert-type\_alert-level.**

Click on the hyperlinks for more details of the test.

---

**Alert level C**

ABSTY02\_ALERT\_1\_C An \_exptl\_absorpt\_correction\_type has been given without  
a literature citation. This should be contained in the  
\_exptl\_absorpt\_process\_details field.

Absorption correction given as multi-scan

PLAT244\_ALERT\_4\_C Low 'Solvent' Ueq as Compared to Neighbors of C91 Check

---

**Alert level G**

PLAT005\_ALERT\_5\_G No Embedded Refinement Details Found in the CIF Please Do !

PLAT066\_ALERT\_1\_G Predicted and Reported Tmin&Tmax Range Identical ? Check

PLAT230\_ALERT\_2\_G Hirshfeld Test Diff for O8 --C8 . 5.5 s.u.

PLAT232\_ALERT\_2\_G Hirshfeld Test Diff (M-X) Fe2 --C3 . 5.3 s.u.

PLAT232\_ALERT\_2\_G Hirshfeld Test Diff (M-X) Fe2 --C4 . 6.9 s.u.

PLAT232\_ALERT\_2\_G Hirshfeld Test Diff (M-X) Fe3 --S4 . 5.0 s.u.

PLAT232\_ALERT\_2\_G Hirshfeld Test Diff (M-X) Fe3 --C5 . 6.7 s.u.

PLAT232\_ALERT\_2\_G Hirshfeld Test Diff (M-X) Fe4 --C8 . 7.1 s.u.

PLAT710\_ALERT\_4\_G Delete 1-2-3 or 2-3-4 Linear Torsion Angle ... # 179 Do !

P1 -FE1 -C1 -O1 -118.00 3.00 1.555 1.555 1.555 1.555

PLAT710\_ALERT\_4\_G Delete 1-2-3 or 2-3-4 Linear Torsion Angle ... # 180 Do !

P2 -FE1 -C1 -O1 154.00 3.00 1.555 1.555 1.555 1.555

PLAT710\_ALERT\_4\_G Delete 1-2-3 or 2-3-4 Linear Torsion Angle ... # 181 Do !

S2 -FE1 -C1 -O1 -10.00 3.00 1.555 1.555 1.555 1.555

PLAT710\_ALERT\_4\_G Delete 1-2-3 or 2-3-4 Linear Torsion Angle ... # 182 Do !

S1 -FE1 -C1 -O1 40.00 3.00 1.555 1.555 1.555 1.555

PLAT710\_ALERT\_4\_G Delete 1-2-3 or 2-3-4 Linear Torsion Angle ... # 183 Do !

FE2 -FE1 -C1 -O1 44.00 3.00 1.555 1.555 1.555 1.555

PLAT710\_ALERT\_4\_G Delete 1-2-3 or 2-3-4 Linear Torsion Angle ... # 184 Do !

C4 -FE2 -C2 -O2 -106.00 6.00 1.555 1.555 1.555 1.555

PLAT710\_ALERT\_4\_G Delete 1-2-3 or 2-3-4 Linear Torsion Angle ... # 185 Do !

C3 -FE2 -C2 -O2 -12.00 6.00 1.555 1.555 1.555 1.555

PLAT710\_ALERT\_4\_G Delete 1-2-3 or 2-3-4 Linear Torsion Angle ... # 186 Do !

S1 -FE2 -C2 -O2 163.00 6.00 1.555 1.555 1.555 1.555

PLAT710\_ALERT\_4\_G Delete 1-2-3 or 2-3-4 Linear Torsion Angle ... # 187 Do !

S2 -FE2 -C2 -O2 81.00 6.00 1.555 1.555 1.555 1.555

PLAT710\_ALERT\_4\_G Delete 1-2-3 or 2-3-4 Linear Torsion Angle ... # 188 Do !

FE1 -FE2 -C2 -O2 113.00 6.00 1.555 1.555 1.555 1.555

PLAT710\_ALERT\_4\_G Delete 1-2-3 or 2-3-4 Linear Torsion Angle ... # 189 Do !

C4 -FE2 -C3 -O3 7.00 14.00 1.555 1.555 1.555 1.555

PLAT710\_ALERT\_4\_G Delete 1-2-3 or 2-3-4 Linear Torsion Angle ... # 190 Do !

C2 -FE2 -C3 -O3 -92.00 14.00 1.555 1.555 1.555 1.555

PLAT710\_ALERT\_4\_G Delete 1-2-3 or 2-3-4 Linear Torsion Angle ... # 191 Do !

S1 -FE2 -C3 -O3 98.00 14.00 1.555 1.555 1.555 1.555

PLAT710\_ALERT\_4\_G Delete 1-2-3 or 2-3-4 Linear Torsion Angle ... # 192 Do !

S2 -FE2 -C3 -O3 17.00 0.00 1.555 1.555 1.555 1.555

PLAT710\_ALERT\_4\_G Delete 1-2-3 or 2-3-4 Linear Torsion Angle ... # 193 Do !

FE1 -FE2 -C3 -O3 113.00 14.00 1.555 1.555 1.555 1.555

PLAT710\_ALERT\_4\_G Delete 1-2-3 or 2-3-4 Linear Torsion Angle ... # 194 Do !

C3 -FE2 -C4 -O4 17.00 0.00 1.555 1.555 1.555 1.555

PLAT710\_ALERT\_4\_G Delete 1-2-3 or 2-3-4 Linear Torsion Angle ... # 195 Do !

C2 -FE2 -C4 -O4 -85.00 7.00 1.555 1.555 1.555 1.555

PLAT710\_ALERT\_4\_G Delete 1-2-3 or 2-3-4 Linear Torsion Angle ... # 196 Do !

S1 -FE2 -C4 -O4 21.00 7.00 1.555 1.555 1.555 1.555

PLAT710\_ALERT\_4\_G Delete 1-2-3 or 2-3-4 Linear Torsion Angle ... # 197 Do !

S2 -FE2 -C4 -O4 70.00 7.00 1.555 1.555 1.555 1.555

PLAT710\_ALERT\_4\_G Delete 1-2-3 or 2-3-4 Linear Torsion Angle ... # 198 Do !

|                   |                                                  |         |       |       |       |       |           |
|-------------------|--------------------------------------------------|---------|-------|-------|-------|-------|-----------|
|                   | FE1 -FE2 -C4 -O4                                 | 75.00   | 7.00  | 1.555 | 1.555 | 1.555 | 1.555     |
| PLAT710_ALERT_4_G | Delete 1-2-3 or 2-3-4 Linear Torsion Angle ... # |         |       |       |       |       | 199 Do !  |
|                   | P3 -FE3 -C5 -O5                                  | 108.00  | 4.00  | 1.555 | 1.555 | 1.555 | 1.555     |
| PLAT710_ALERT_4_G | Delete 1-2-3 or 2-3-4 Linear Torsion Angle ... # |         |       |       |       |       | 200 Do !  |
|                   | P4 -FE3 -C5 -O5                                  | -164.00 | 4.00  | 1.555 | 1.555 | 1.555 | 1.555     |
| PLAT710_ALERT_4_G | Delete 1-2-3 or 2-3-4 Linear Torsion Angle ... # |         |       |       |       |       | 201 Do !  |
|                   | S4 -FE3 -C5 -O5                                  | -52.00  | 4.00  | 1.555 | 1.555 | 1.555 | 1.555     |
| PLAT710_ALERT_4_G | Delete 1-2-3 or 2-3-4 Linear Torsion Angle ... # |         |       |       |       |       | 202 Do !  |
|                   | S3 -FE3 -C5 -O5                                  | 0.00    | 4.00  | 1.555 | 1.555 | 1.555 | 1.555     |
| PLAT710_ALERT_4_G | Delete 1-2-3 or 2-3-4 Linear Torsion Angle ... # |         |       |       |       |       | 203 Do !  |
|                   | FE4 -FE3 -C5 -O5                                 | -54.00  | 4.00  | 1.555 | 1.555 | 1.555 | 1.555     |
| PLAT710_ALERT_4_G | Delete 1-2-3 or 2-3-4 Linear Torsion Angle ... # |         |       |       |       |       | 204 Do !  |
|                   | C8 -FE4 -C6 -O6                                  | 71.00   | 7.00  | 1.555 | 1.555 | 1.555 | 1.555     |
| PLAT710_ALERT_4_G | Delete 1-2-3 or 2-3-4 Linear Torsion Angle ... # |         |       |       |       |       | 205 Do !  |
|                   | C7 -FE4 -C6 -O6                                  | -24.00  | 7.00  | 1.555 | 1.555 | 1.555 | 1.555     |
| PLAT710_ALERT_4_G | Delete 1-2-3 or 2-3-4 Linear Torsion Angle ... # |         |       |       |       |       | 206 Do !  |
|                   | S4 -FE4 -C6 -O6                                  | 161.00  | 7.00  | 1.555 | 1.555 | 1.555 | 1.555     |
| PLAT710_ALERT_4_G | Delete 1-2-3 or 2-3-4 Linear Torsion Angle ... # |         |       |       |       |       | 207 Do !  |
|                   | S3 -FE4 -C6 -O6                                  | -117.00 | 7.00  | 1.555 | 1.555 | 1.555 | 1.555     |
| PLAT710_ALERT_4_G | Delete 1-2-3 or 2-3-4 Linear Torsion Angle ... # |         |       |       |       |       | 208 Do !  |
|                   | FE3 -FE4 -C6 -O6                                 | -154.00 | 7.00  | 1.555 | 1.555 | 1.555 | 1.555     |
| PLAT710_ALERT_4_G | Delete 1-2-3 or 2-3-4 Linear Torsion Angle ... # |         |       |       |       |       | 209 Do !  |
|                   | C8 -FE4 -C7 -O7                                  | -4.00   | 21.00 | 1.555 | 1.555 | 1.555 | 1.555     |
| PLAT710_ALERT_4_G | Delete 1-2-3 or 2-3-4 Linear Torsion Angle ... # |         |       |       |       |       | 210 Do !  |
|                   | C6 -FE4 -C7 -O7                                  | 93.00   | 21.00 | 1.555 | 1.555 | 1.555 | 1.555     |
| PLAT710_ALERT_4_G | Delete 1-2-3 or 2-3-4 Linear Torsion Angle ... # |         |       |       |       |       | 211 Do !  |
|                   | S4 -FE4 -C7 -O7                                  | -98.00  | 21.00 | 1.555 | 1.555 | 1.555 | 1.555     |
| PLAT710_ALERT_4_G | Delete 1-2-3 or 2-3-4 Linear Torsion Angle ... # |         |       |       |       |       | 212 Do !  |
|                   | S3 -FE4 -C7 -O7                                  | 17.00   | 0.00  | 1.555 | 1.555 | 1.555 | 1.555     |
| PLAT710_ALERT_4_G | Delete 1-2-3 or 2-3-4 Linear Torsion Angle ... # |         |       |       |       |       | 213 Do !  |
|                   | FE3 -FE4 -C7 -O7                                 | -110.00 | 21.00 | 1.555 | 1.555 | 1.555 | 1.555     |
| PLAT710_ALERT_4_G | Delete 1-2-3 or 2-3-4 Linear Torsion Angle ... # |         |       |       |       |       | 214 Do !  |
|                   | C7 -FE4 -C8 -O8                                  | 145.00  | 7.00  | 1.555 | 1.555 | 1.555 | 1.555     |
| PLAT710_ALERT_4_G | Delete 1-2-3 or 2-3-4 Linear Torsion Angle ... # |         |       |       |       |       | 215 Do !  |
|                   | C6 -FE4 -C8 -O8                                  | 43.00   | 7.00  | 1.555 | 1.555 | 1.555 | 1.555     |
| PLAT710_ALERT_4_G | Delete 1-2-3 or 2-3-4 Linear Torsion Angle ... # |         |       |       |       |       | 216 Do !  |
|                   | S4 -FE4 -C8 -O8                                  | -62.00  | 7.00  | 1.555 | 1.555 | 1.555 | 1.555     |
| PLAT710_ALERT_4_G | Delete 1-2-3 or 2-3-4 Linear Torsion Angle ... # |         |       |       |       |       | 217 Do !  |
|                   | S3 -FE4 -C8 -O8                                  | -114.00 | 7.00  | 1.555 | 1.555 | 1.555 | 1.555     |
| PLAT710_ALERT_4_G | Delete 1-2-3 or 2-3-4 Linear Torsion Angle ... # |         |       |       |       |       | 218 Do !  |
|                   | FE3 -FE4 -C8 -O8                                 | -115.00 | 7.00  | 1.555 | 1.555 | 1.555 | 1.555     |
| PLAT794_ALERT_5_G | Tentative Bond Valency for Fe2 (II)              |         |       |       |       |       | 2.65 Info |
| PLAT794_ALERT_5_G | Tentative Bond Valency for Fe4 (II)              |         |       |       |       |       | 2.68 Info |
| PLAT899_ALERT_4_G | SHELXL97 is Deprecated and Succeeded by SHELXL   |         |       |       |       |       | 2018 Note |

---

0 **ALERT level A** = Most likely a serious problem - resolve or explain  
 0 **ALERT level B** = A potentially serious problem, consider carefully  
 2 **ALERT level C** = Check. Ensure it is not caused by an omission or oversight  
 51 **ALERT level G** = General information/check it is not something unexpected

2 ALERT type 1 CIF construction/syntax error, inconsistent or missing data  
 6 ALERT type 2 Indicator that the structure model may be wrong or deficient  
 0 ALERT type 3 Indicator that the structure quality may be low  
 42 ALERT type 4 Improvement, methodology, query or suggestion  
 3 ALERT type 5 Informative message, check

---

## Validation response form

Please find below a validation response form (VRF) that can be filled in and pasted into your CIF.

```
# start Validation Reply Form
_vrf_ABSTY02_str0604
;
PROBLEM: An _exptl_absorpt_correction_type has been given without
RESPONSE: ...
;
_vrf_PLAT244_str0604
;
PROBLEM: Low      'Solvent' Ueq as Compared to Neighbors of      C91 Check
RESPONSE: ...
;
# end Validation Reply Form
```

---

It is advisable to attempt to resolve as many as possible of the alerts in all categories. Often the minor alerts point to easily fixed oversights, errors and omissions in your CIF or refinement strategy, so attention to these fine details can be worthwhile. In order to resolve some of the more serious problems it may be necessary to carry out additional measurements or structure refinements. However, the purpose of your study may justify the reported deviations and the more serious of these should normally be commented upon in the discussion or experimental section of a paper or in the "special\_details" fields of the CIF. checkCIF was carefully designed to identify outliers and unusual parameters, but every test has its limitations and alerts that are not important in a particular case may appear. Conversely, the absence of alerts does not guarantee there are no aspects of the results needing attention. It is up to the individual to critically assess their own results and, if necessary, seek expert advice.

### **Publication of your CIF in IUCr journals**

A basic structural check has been run on your CIF. These basic checks will be run on all CIFs submitted for publication in IUCr journals (*Acta Crystallographica*, *Journal of Applied Crystallography*, *Journal of Synchrotron Radiation*); however, if you intend to submit to *Acta Crystallographica Section C* or *E* or *IUCrData*, you should make sure that full publication checks are run on the final version of your CIF prior to submission.

### **Publication of your CIF in other journals**

Please refer to the *Notes for Authors* of the relevant journal for any special instructions relating to CIF submission.

---

**PLATON version of 14/07/2018; check.def file version of 05/06/2018**

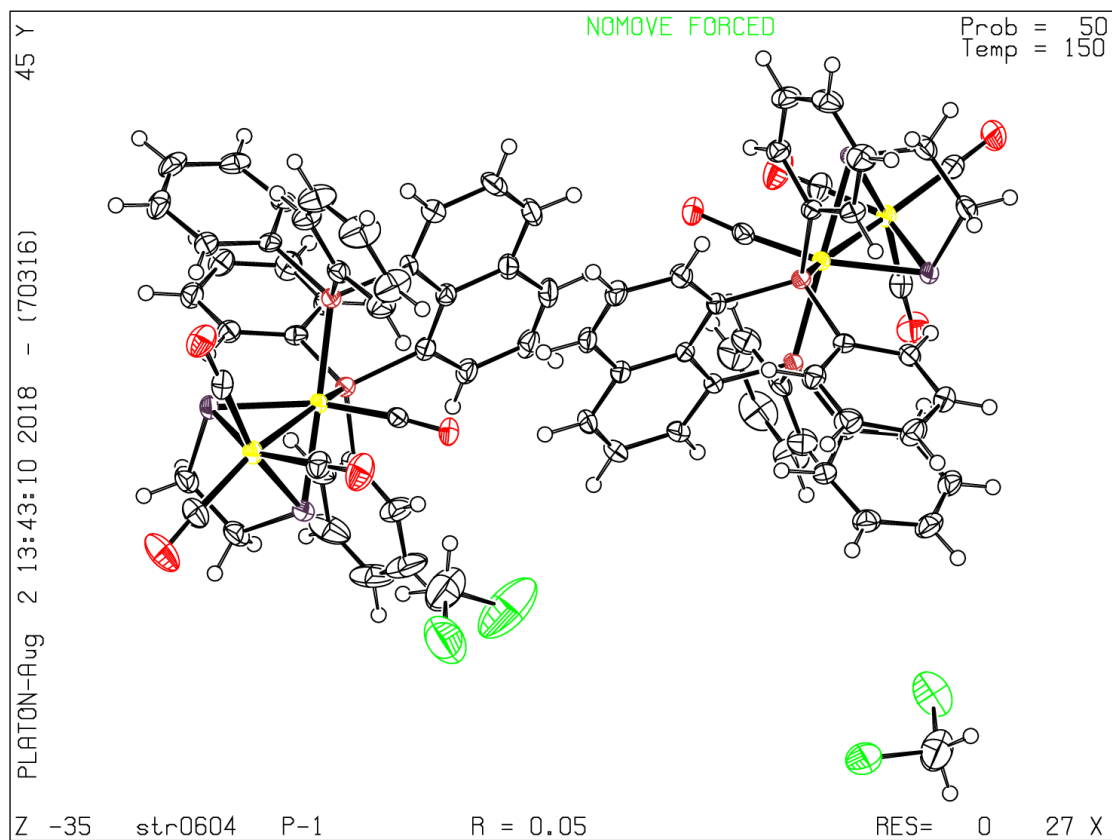

Supplement: s1 [file s1]
