# Supplementary material
Source: MDPI journal article supplement (https://www.mdpi.com/2304-6740/6/4/122)
Supplement: s1 [file s1]

# Supplementary Materials: Hydrogenase Biomimetics with Redox-Active Ligands: Synthesis, Structure, and Electrocatalytic Studies on $[\text{Fe}_2(\text{CO})_4(\kappa^2\text{-dppn})(\mu\text{-edt})]$ (edt = Ethanedithiolate; dppn = 1,8-bis(Diphenylphosphino)Naphthalene)

Shishir Ghosh, Shahed Rana, Nathan Hollingsworth, Michael G. Richmond, Shariff E. Kabir and Graeme Hogarth

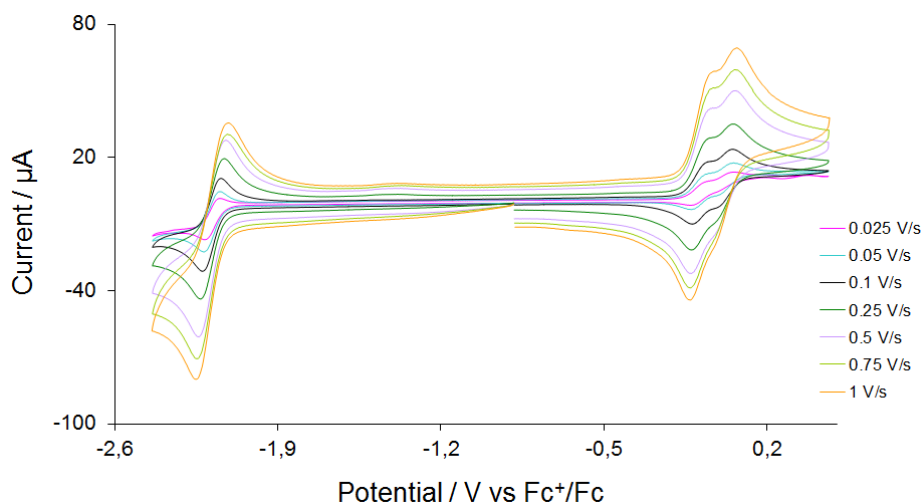

**Figure S1.** CVs of  $[\text{Fe}_2(\text{CO})_4(\kappa^2\text{-dppn})(\mu\text{-edt})]$  (3) at various scan rates as shown in the legend (in MeCN, 1 mM solution, supporting electrolyte  $[\text{NBu}_4][\text{PF}_6]$ , scan rate  $0.1 \text{ V}\cdot\text{s}^{-1}$ , glassy carbon electrode, potential vs  $\text{Fc}^+/\text{Fc}$ ).

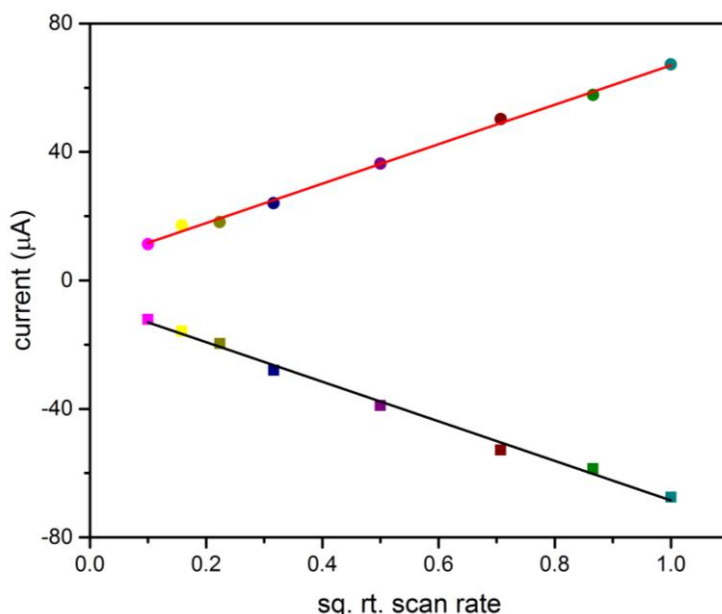

**Figure S2.** Scan rate dependence of the cathodic and anodic peak currents for the reduction of  $[\text{Fe}_2(\text{CO})_4(\kappa^2\text{-dppn})(\mu\text{-edt})]$  (3) in MeCN (1 mM solution, supporting electrolyte  $[\text{NBu}_4][\text{PF}_6]$ , glassy carbon electrode, potential vs  $\text{Fc}^+/\text{Fc}$ ). Lines show best linear fit of data.

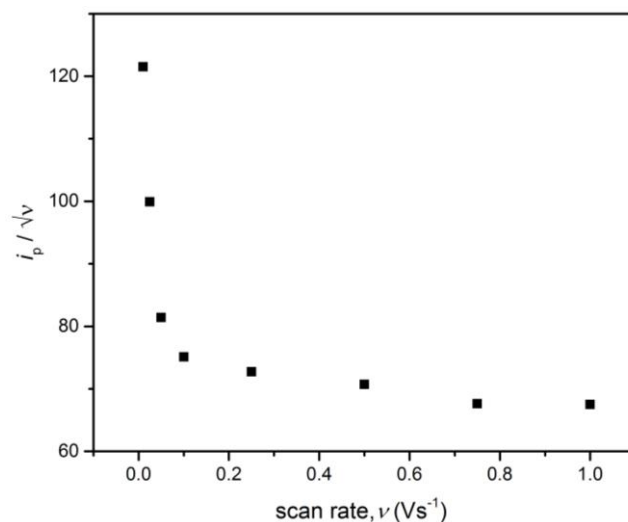

**Figure S3.** Scan rate ( $\nu$ ) dependence of the current function ( $i_p/\sqrt{\nu}$ ) for the reduction of  $[\text{Fe}_2(\text{CO})_4(\kappa^2\text{-dppn})(\mu\text{-edt})]$  (**3**) (1 mM solution in MeCN, supporting electrolyte  $[\text{NBu}_4][\text{PF}_6]$ , glassy carbon electrode, potential vs  $\text{Fc}^+/\text{Fc}$ ).

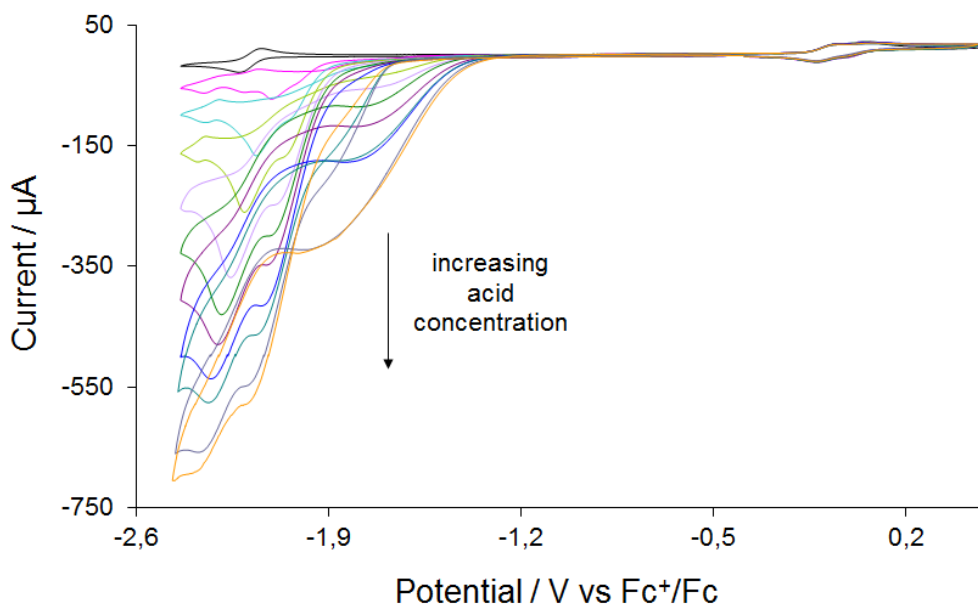

**Figure S4.** CVs of  $[\text{Fe}_2(\text{CO})_4(\kappa^2\text{-dppn})(\mu\text{-edt})]$  (**3**) in the absence of acid and in the presence of 1–10 equivalents of  $\text{CF}_3\text{CO}_2\text{H}$  (in MeCN, 1 mM solution, supporting electrolyte  $[\text{NBu}_4][\text{PF}_6]$ , scan rate  $0.1 \text{ V}\cdot\text{s}^{-1}$ , glassy carbon electrode, potential vs  $\text{Fc}^+/\text{Fc}$ ).
